# Supplementary material for: Immunoprofiling of Nonarteritic Anterior Ischemic Optic Neuropathy
Source: PubMed Central journal article supplement — Transl Vis Sci Technol. 2021 Jul 15;10(8):17. doi: 10.1167/tvst.10.8.17 (PMC8288058; doi:10.1167/tvst.10.8.17), 2021-07-15
Supplement: tvst-10-8-17_s003.pdf [file tvst-10-8-17_s003.pdf]

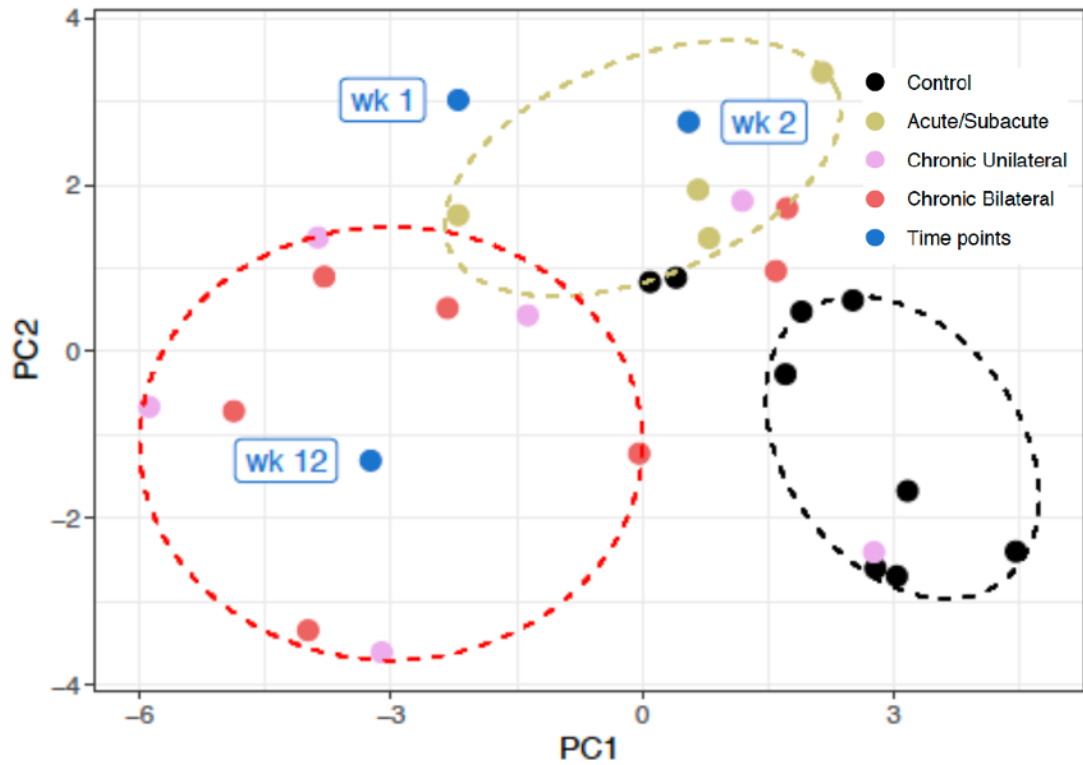

**Supplementary Figure 1.** Principal Component Analysis of the 20 molecules for all patients plus one patient who had longitudinal data acquired (blue dots) at weeks 1, 2 and 12 after non-arteritic anterior ischemic optic neuropathy (NAION) onset. The first 2 weeks points are close to the other acute cases while the third week point is relatively far away and located in the chronic cases.
